# Supplementary material
Source: PubMed Central journal article supplement (PMC5567484)
Supplement: 12264_2016_67_MOESM1_ESM.pdf [file 12264_2016_67_MOESM1_ESM.pdf]

## Supplemental Material

**Table S1. Demographic Characteristics of Participants**

|                                                 | Case I                        | Case II                       | Case III                      | Case IV                       | Case V         |
|-------------------------------------------------|-------------------------------|-------------------------------|-------------------------------|-------------------------------|----------------|
| <b>Sex</b>                                      | <b>Male</b>                   | <b>Female</b>                 | <b>Male</b>                   | <b>Male</b>                   | <b>Male</b>    |
| <b>Age (years)</b>                              | <b>82</b>                     | <b>83</b>                     | <b>77</b>                     | <b>54</b>                     | <b>75</b>      |
| <b>Education (years)</b>                        | <b>12</b>                     | <b>5</b>                      | <b>15</b>                     | <b>9</b>                      | <b>0</b>       |
| <b>APOE genotype</b>                            | <b>ε3/4</b>                   | <b>ε 3/4</b>                  | <b>ε 4/4</b>                  | <b>ε 3/4</b>                  | <b>ε 2/3</b>   |
| <b>Duration of cognitive impairment (years)</b> | <b>1</b>                      | <b>5</b>                      | <b>&gt; 4</b>                 | <b>&gt; 1</b>                 | <b>&gt; 10</b> |
| <b>Blood TDP level (nmol/L)</b>                 | <b>111.82</b>                 | <b>135.02</b>                 | <b>92.65</b>                  | <b>116.99</b>                 | <b>60.96</b>   |
| <b>Blood TMP level (nmol/L)</b>                 | <b>31.73</b>                  | <b>16.05</b>                  | <b>17.88</b>                  | <b>22.15</b>                  | <b>17.92</b>   |
| <b>Blood thiamine level (nmol/L)</b>            | <b>4.27</b>                   | <b>3.63</b>                   | <b>2.11</b>                   | <b>6.12</b>                   | <b>2.16</b>    |
| <b>Hemoglobin level (g/L)</b>                   | <b>128</b>                    | <b>120</b>                    | <b>139</b>                    | <b>150</b>                    | <b>130</b>     |
| <b>Fasting plasma glucose (mmol/L)</b>          | <b>4.9</b>                    | <b>5.3</b>                    | <b>5.1</b>                    | <b>5.8</b>                    | <b>6.2</b>     |
| <b>ALT (U/L)</b>                                | <b>21</b>                     | <b>12</b>                     | <b>20</b>                     | <b>29</b>                     | <b>27</b>      |
| <b>Cre (μmol/L)</b>                             | <b>67</b>                     | <b>61</b>                     | <b>97</b>                     | <b>63</b>                     | <b>79</b>      |
| <b>FT3 (pmol/L)</b>                             | <b>3.7</b>                    | <b>3.4</b>                    | <b>4.4</b>                    | <b>4.8</b>                    | <b>3.8</b>     |
| <b>FT4 (pmol/L)</b>                             | <b>13.5</b>                   | <b>12.1</b>                   | <b>16.0</b>                   | <b>17.0</b>                   | <b>13.5</b>    |
| <b>TSH (mIU/L)</b>                              | <b>1.25</b>                   | <b>5.12</b>                   | <b>2.19</b>                   | <b>1.67</b>                   | <b>4.7</b>     |
| <b>Folate (nmol/L)</b>                          | <b>11.0</b>                   | <b>9.8</b>                    | <b>6.7</b>                    | <b>8.0</b>                    | <b>6.6</b>     |
| <b>Vitamin B12 (pmol/L)</b>                     | <b>761.2</b>                  | <b>499.9</b>                  | <b>463.2</b>                  | <b>894.8</b>                  | <b>230.6</b>   |
| <b>AD medication beyond benfotiamine</b>        | <b>Donepezil (5 mg daily)</b> | <b>None</b>    |

**Abbreviations:** TDP: thiamine diphosphate; TMP: thiamine monophosphate; ALT: alanine aminotransferase; Cre: creatinine; FT3: free triiodothyronine; FT4: free thyroxine; TSH: thyroid stimulating hormone.
